# Supplementary material
Source: PubMed Central journal article supplement (PMC423265)

**A**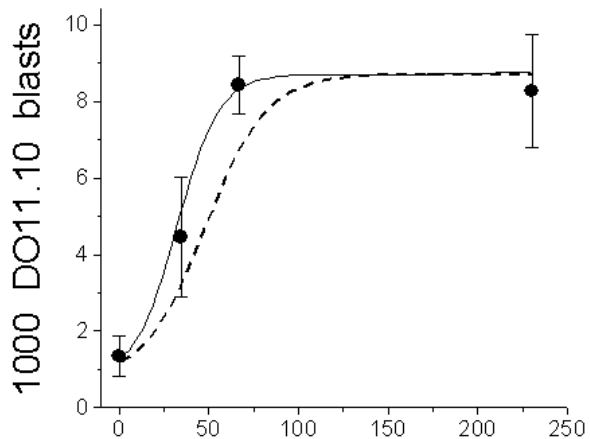**B**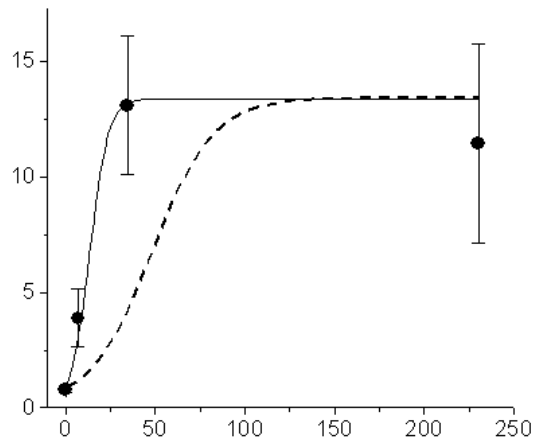

1000 GFP\_OVA copies per *Salmonella* cell

Supplement: pnas_101_23_8739__2.pdf [file pnas_101_23_8739__2.pdf]

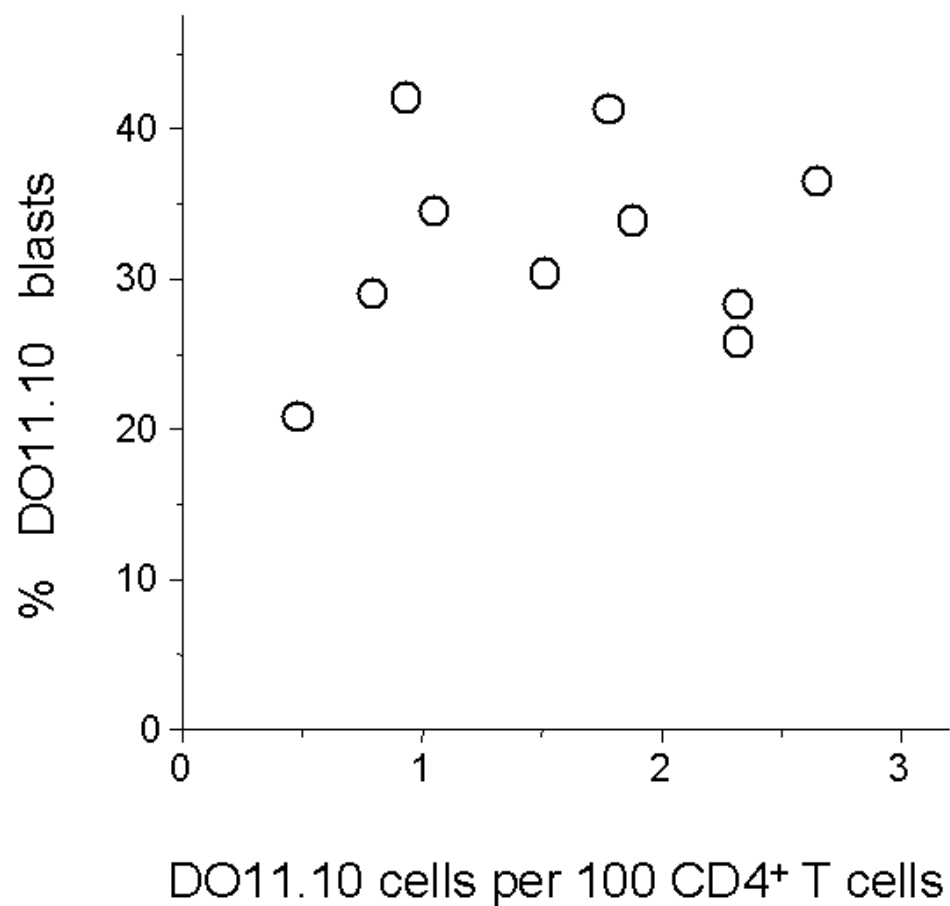

Supplement: pnas_101_23_8739__3.pdf [file pnas_101_23_8739__3.pdf]

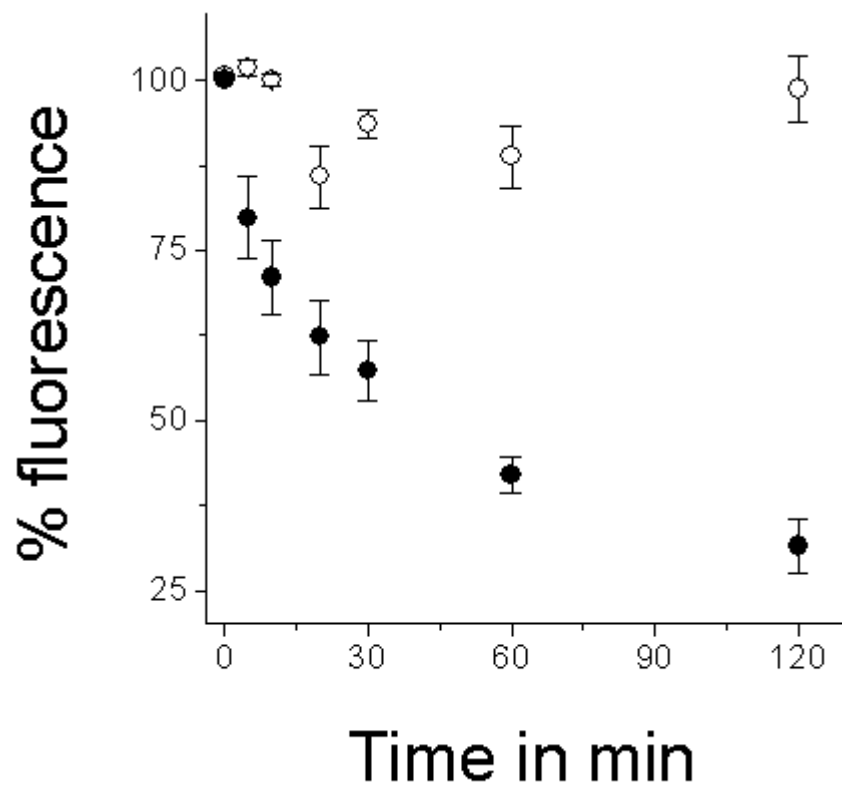

Supplement: pnas_101_23_8739__4.pdf [file pnas_101_23_8739__4.pdf]
